# Supplementary material
Source: Springer Nature journal article supplement (https://www.springermedizin.de/resource/supplementary/12943_2014_1419_MOESM9_ESM.pdf/9552940)

Additional file 9: Figure S8

CD24<sup>+</sup> sorted cells

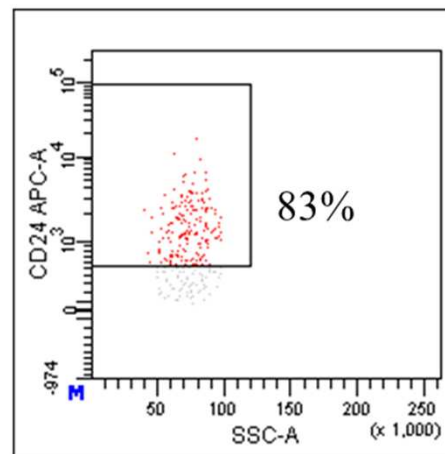

CD24<sup>-</sup> sorted cells

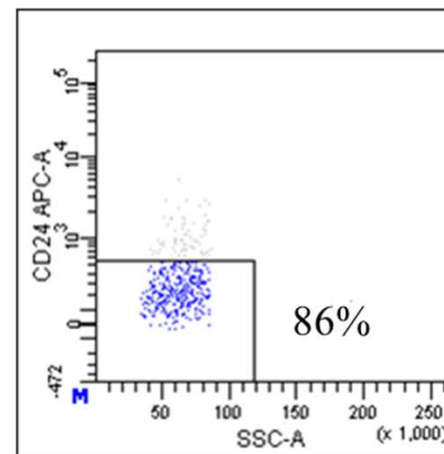

Supplement: MOESM9 [file 9552940]
